# Supplementary material for: Serpin peptidase inhibitor (SERPINB5) haplotypes are associated with susceptibility to hepatocellular carcinoma
Source: PubMed Central journal article supplement (PMC4879545; doi:10.1038/srep26605), 2016-05-25
Supplement: srep26605-s1.pdf [file srep26605-s1.pdf]

## Title

Serpin peptidase inhibitor (*SERPINB5*) haplotypes are associated with susceptibility to hepatocellular carcinoma

## Author list and affiliations

Shun-Fa Yang<sup>1,2</sup>, Chao-Bin Yeh<sup>3,4</sup>, Ying-Erh Chou<sup>2,5</sup>, Hsiang-Lin Lee<sup>1,6</sup>, and Yu-Fan Liu<sup>7,8\*</sup>

<sup>1</sup>Institute of Medicine, Chung Shan Medical University, Taichung, Taiwan

<sup>2</sup>Department of Medical Research, Chung Shan Medical University Hospital, Taichung, Taiwan

<sup>3</sup>Department of Emergency Medicine, School of Medicine, Chung Shan Medical University, Taichung, Taiwan

<sup>4</sup>Department of Emergency Medicine, Chung Shan Medical University Hospital, Taichung, Taiwan

<sup>5</sup>School of Medicine, Chung Shan Medical University, Taichung, Taiwan

<sup>6</sup>Department of Surgery, Chung Shan Medical University Hospital, Taichung, Taiwan

<sup>7</sup>Department of Biomedical Sciences, College of Medicine Sciences and Technology, Chung Shan Medical University, Taichung, Taiwan

<sup>8</sup>Division of Allergy, Department of Pediatrics, Chung-Shan Medical University Hospital, Taichung, Taiwan

**\*Address correspondence to:** Yu-Fan Liu, Ph.D., Department of Biomedical Sciences, College of Medicine Sciences and Technology, Chung Shan Medical University, 110 Sec. 1, Chien-Kuo N. Road, Taichung 40201, Taiwan. Telephone: +886-4-24730022 ext. 11819; Fax: +886-4-24751101

E-mail: yfliu@csmu.edu.tw

**Table S1** | Exon and intron structure of *SERPINB5* gene in Homo sapiens and the feature of SNPs of *SERPINB5*, which were used to analyze in this study

|                   | Exon (chromosome position) |                          |                        |                   |                   |                   |
|-------------------|----------------------------|--------------------------|------------------------|-------------------|-------------------|-------------------|
|                   | Promoter<br>(61,143,908)#  | Promoter<br>(61,144,053) | Intron<br>(61,148,149) | 6<br>(61,160,287) | 6<br>(61,160,320) | 8<br>(61,170,782) |
| nucleotide change | T>C                        | C>T                      | C>T                    | C>T               | G>C               | A>G               |
| mRNA position†    | -                          | -                        | -                      | 668               | 701               | 1,097             |
| Protein position‡ | -                          | -                        | -                      | 176               | 187               | 319               |
| dbSNP (rs number) | rs17071138                 | rs3744941                | rs8089104              | rs2289519         | rs2289520         | rs1455555         |
| Function          | -                          | -                        | -                      | nonsynonymous     | nonsynonymous     | nonsynonymous     |
| dbSNP allele      | -                          | -                        | -                      | TCT>CCT           | GTC>CTC           | ATC>GTC           |
| Protein residue   | -                          | -                        | -                      | Ser>Pro           | Val>Leu           | Ile>Val           |
| Codon position    | -                          | -                        | -                      | 1                 | 1                 | 1                 |
| Heterozygous (%)  | 22.2                       | 46.5                     | 51.1                   | 51.2              | 32.6              | 62.8              |

# GRCh37.p13

† NM\_002693.4

‡ NP\_002630.2

**TABLE S2** | Association of *SERPINB5* genotypic frequencies with HCC laboratory status

| Characteristic    | $\alpha$ -Fetoprotein <sup>†</sup><br>(ng/mL) | AST <sup>†</sup><br>(IU/L) | ALT <sup>†</sup><br>(IU/L) | AST/ALT <sup>†</sup><br>ratio |
|-------------------|-----------------------------------------------|----------------------------|----------------------------|-------------------------------|
| <b>rs1455555</b>  |                                               |                            |                            |                               |
| AA                | 4111.4 ± 1892.4                               | 132.5 ± 21.4               | 108.1 ± 18.7               | 1.68 ± 0.25                   |
| AG+GG             | 2557.8 ± 833.0                                | 152.9 ± 23.1               | 128.8 ± 17.8               | 1.45 ± 0.08                   |
| <i>P</i> value    | 0.384                                         | 0.604                      | 0.503                      | 0.242                         |
| <b>rs17071138</b> |                                               |                            |                            |                               |
| TT                | 2661.6 ± 854.9                                | 128.5 ± 16.3               | 113.4 ± 13.7               | 1.46 ± 0.10                   |
| TC+CC             | 4022.7 ± 1939.1                               | 204.4 ± 51.3               | 152.5 ± 37.4               | 1.67 ± 0.18                   |
| <i>P</i> value    | 0.465                                         | 0.064                      | 0.224                      | 0.305                         |
| <b>rs2289519</b>  |                                               |                            |                            |                               |
| CC                | 4701.5 ± 1746.8                               | 180.3 ± 37.1               | 133.8 ± 24.5               | 1.47 ± 0.08                   |
| CT+TT             | 1822.5 ± 609.7                                | 124.3 ± 15.2               | 115.5 ± 16.2               | 1.54 ± 0.14                   |
| <i>P</i> value    | 0.077                                         | 0.119                      | 0.517                      | 0.682                         |
| <b>rs2289520</b>  |                                               |                            |                            |                               |
| GG                | 2340.7 ± 795.2                                | 139.8 ± 20.8               | 129.3 ± 17.9               | 1.39 ± 0.09                   |
| GC+CC             | 3826.6 ± 1511.8                               | 156.4 ± 30.2               | 115.0 ± 21.7               | 1.67 ± 0.17                   |
| <i>P</i> value    | 0.358                                         | 0.640                      | 0.609                      | 0.118                         |
| <b>rs3744941</b>  |                                               |                            |                            |                               |
| CC                | 3630.3 ± 1559.0                               | 157.2 ± 30.8               | 126.2 ± 23.1               | 1.47 ± 0.08                   |
| CT+TT             | 2546.5 ± 810.8                                | 140.0 ± 20.8               | 120.7 ± 17.1               | 1.54 ± 0.14                   |
| <i>P</i> value    | 0.506                                         | 0.632                      | 0.847                      | 0.667                         |
| <b>rs8089104</b>  |                                               |                            |                            |                               |
| CC                | 2289.6 ± 1192.9                               | 183.8 ± 41.3               | 138.1 ± 29.8               | 1.50 ± 0.10                   |
| CT+TT             | 3313.9 ± 1030.6                               | 130.5 ± 17.5               | 116.1 ± 14.9               | 1.52 ± 0.12                   |
| <i>P</i> value    | 0.554                                         | 0.763                      | 0.463                      | 0.950                         |

Mann-Whitney U test was used between two groups.

<sup>†</sup> Mean ± S.E.

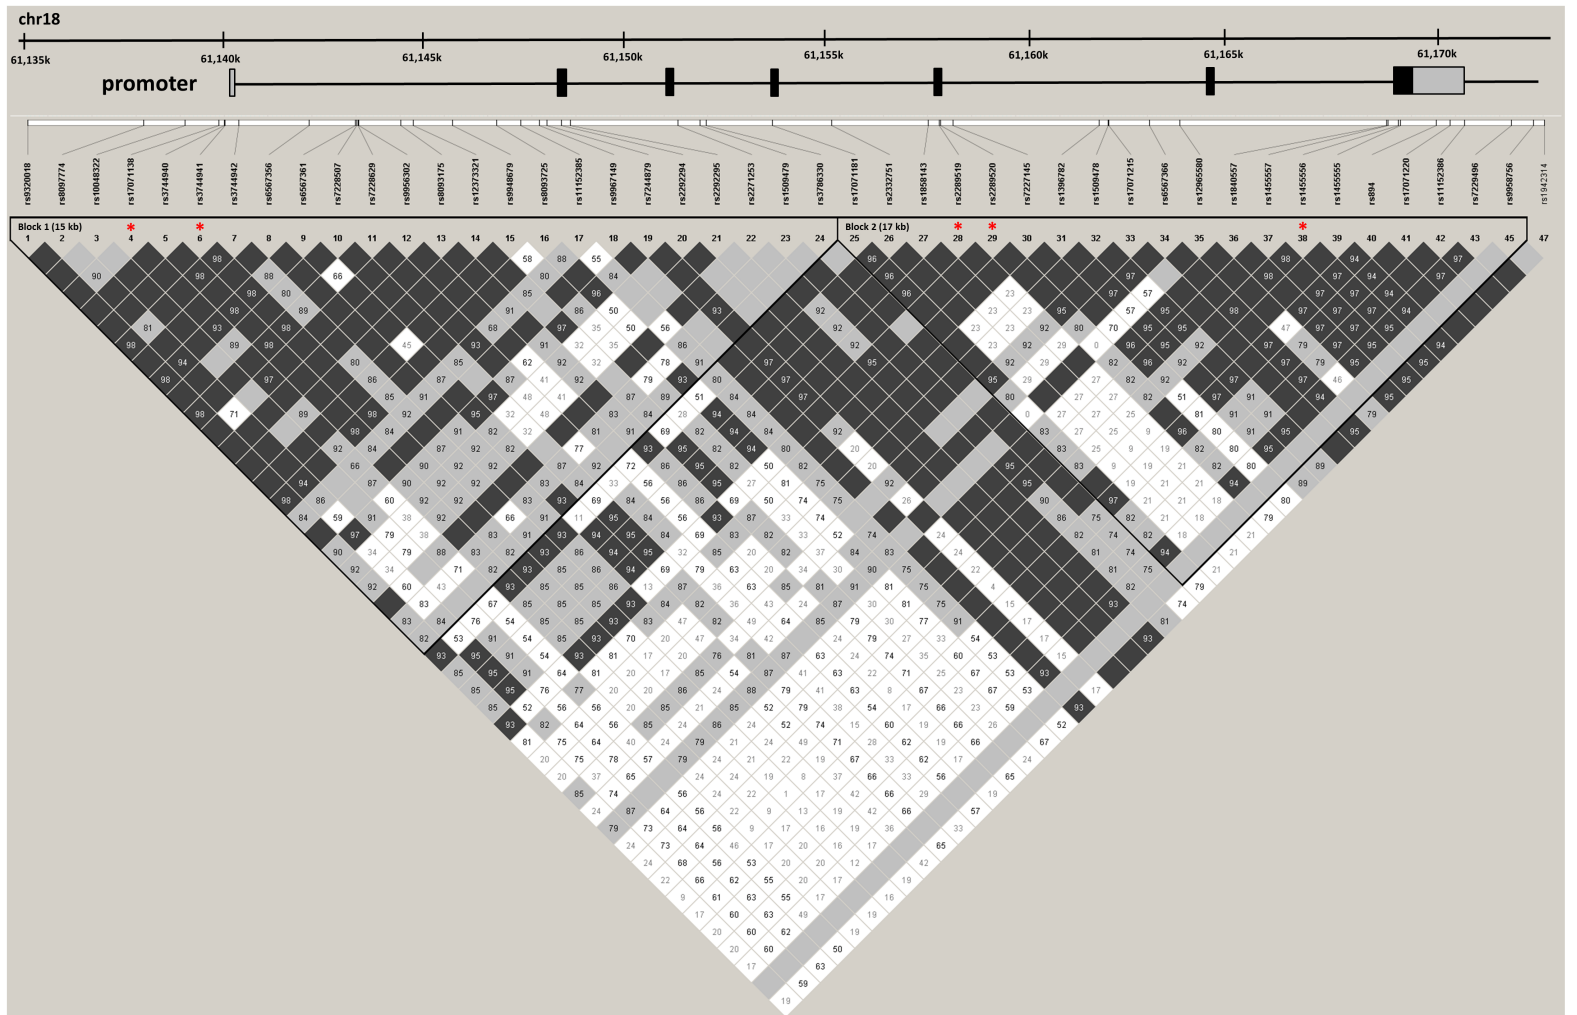

**Figure S1 | Linkage disequilibrium map constructed from 45 selected SNP tags in the SERPINB5 gene.** In the LD map, SNP-pairwise correlation coefficients and Hedrick's multiallelic  $D'$  in the East Asian population (HCB+JPT) are shown in black squares when  $D' = 1.0$  and white squares when  $D' = 0$ . The "4 Gamete" conventional grey scale is used to display the LDs shown in black through grey (the colour intensity decreases with the decrease in the  $D'$  value) generated by Haploview version 4.2. SNPs located within and around the SERPINB5 gene were plotted against the chromosomal positions chr.18: 61,135,000 to 61,180,000 (HapMap version 3 release 27). Exons, introns and untranslated regions are indicated with filled boxes, unfilled boxes and thin lines from the 5' to 3' end of this gene, respectively. The red stars indicate the selected genotyping of the SERPINB5 SNP polymorphisms.

(a)

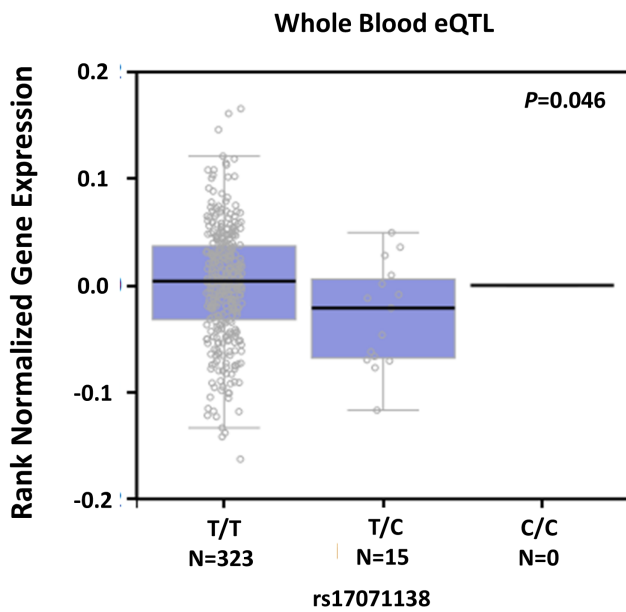

(b)

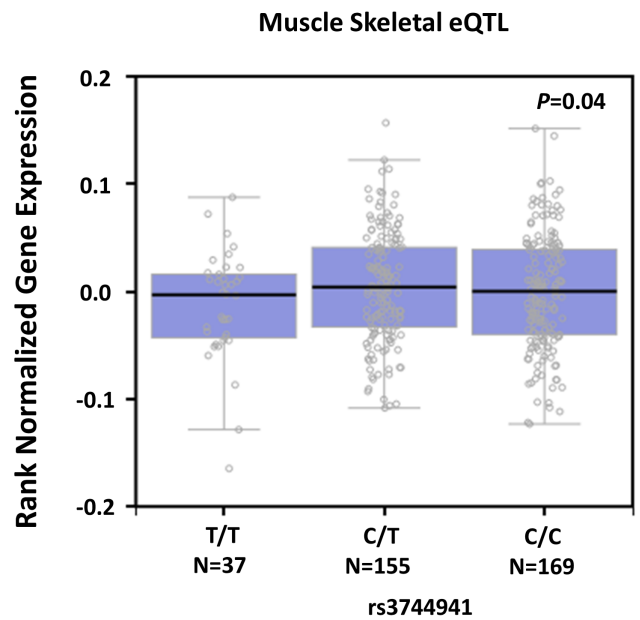

**Figure S2 | Expression of quantitative trait loci of the HCC risk-associated haplotype and the features of the *SERPINB5* gene SNPs (NM\_002639) analysed in this study.** Expression quantitative trait loci associations between (a) rs17071138 and (b) rs3744941 with *SERPINB5* expression in the whole blood and muscle\_skeletal (GTEx data set), respectively. Numbers in parentheses indicate the numbers of cases.
